# Supplementary material for: Inhibition of ARC decreases the survival of HEI-OC-1 cells after neomycin damage in vitro
Source: PubMed Central journal article supplement (PMC5341827; doi:10.18632/oncotarget.11336), 2016-08-20
Supplement: oncotarget-07-66647-s001.pdf [file oncotarget-07-66647-s001.pdf]

## Inhibition of ARC decreases the survival of HEI-OC-1 cells after neomycin damage *in vitro*

### Supplementary Materials

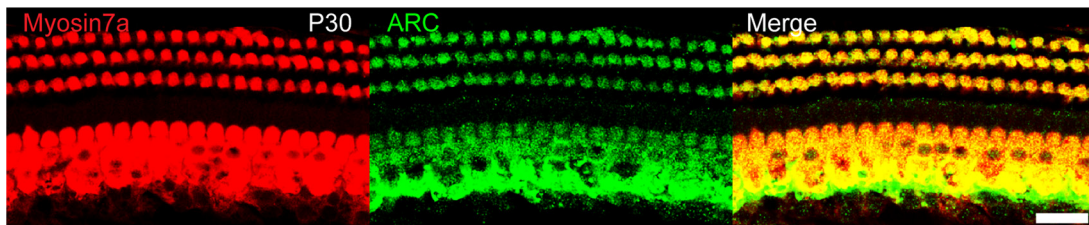

Supplementary Figure S1: Immunofluorescence staining showed that ARC was expressed in the P30 mouse cochlear HCs. Scale bars = 20  $\mu$ m.

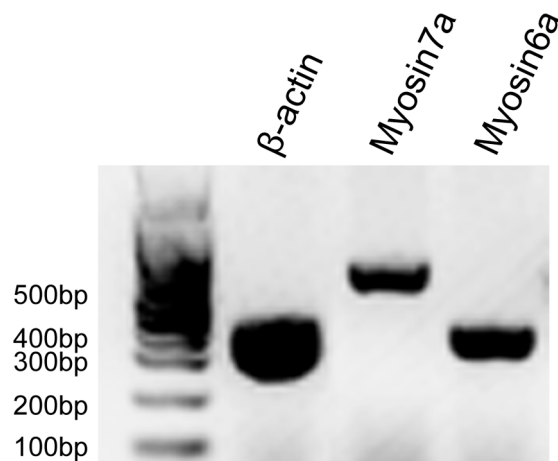

Supplementary Figure S2: RT-PCR showed that HEI-OC-1 cells expressed the HC markers Myosin 7a and Myosin 6a.

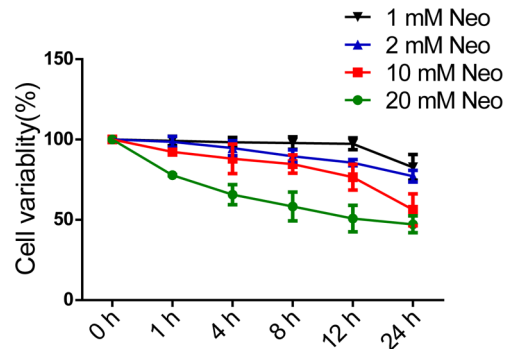

**Supplementary Figure S3: The viability of HEI-OC-1 cells decreased gradually with both increasing neomycin doses and exposure time.** Cell viability was detected by CCK-8 after HEI-OC-1 cells were treated with 1 mM to 20 mM neomycin for 1 h to 24 h in 96-well plates. Each condition was performed in triplicate. Data are shown as mean  $\pm$  S.D. \* $p < 0.05$ .

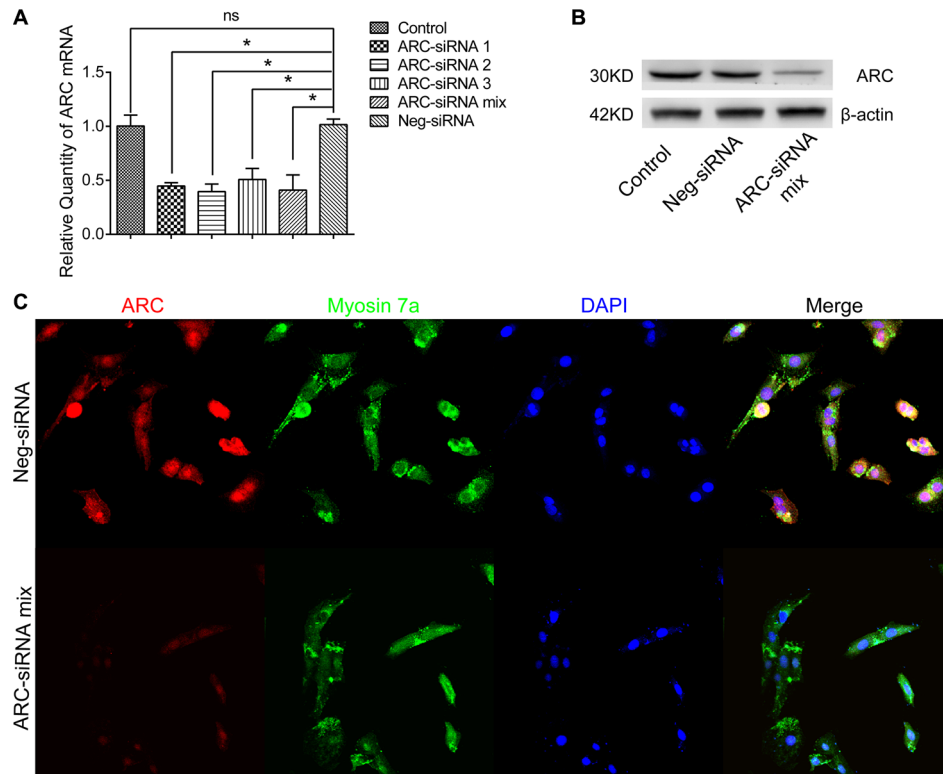

**Supplementary Figure S4: ARC was inhibited by transfection with ARC-siRNA.** (A) The mRNA levels of ARC decreased significantly after transfection with each ARC-siRNA and with the mixture of all three ARC-siRNAs. (B) The protein levels of ARC decreased significantly after transfection with the ARC-siRNA mixture. (C) Immunofluorescence staining showed that ARC expression was significantly decreased after transfection with the ARC-siRNA mixture. Data are shown as mean  $\pm$  S.D. \* $p < 0.05$ . Scale bars = 20  $\mu$ m.

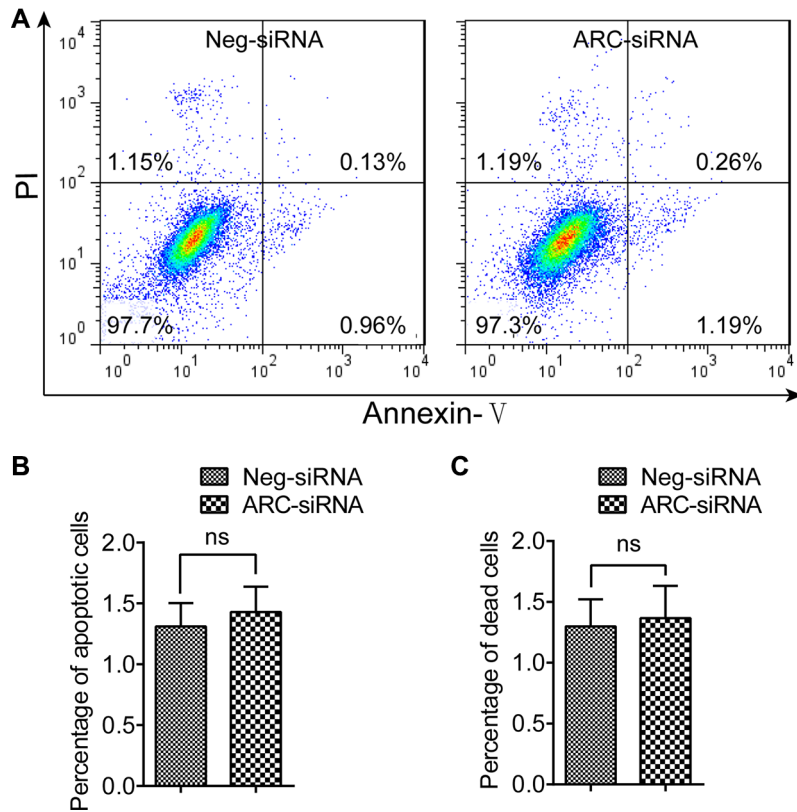

**Supplementary Figure S5: Flow cytometry showed that there was no significant difference in the percentages of dead and apoptotic cells when ARC was inhibited without neomycin damage. Data are shown as mean ± S.D. \* $p < 0.05$ .**

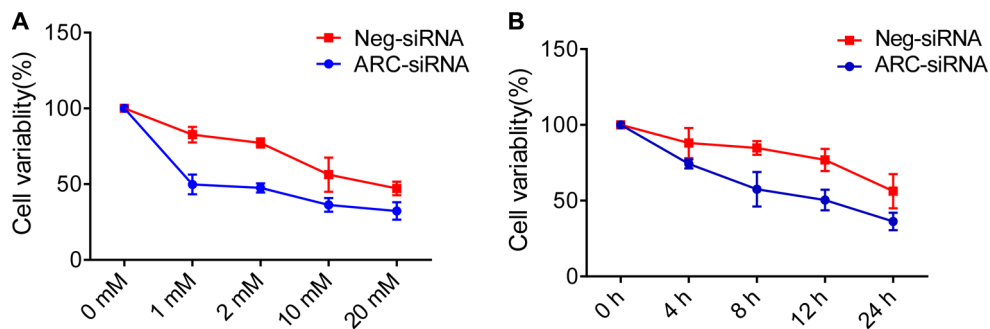

**Supplementary Figure S6: The viability of HEI-OC-1 cells decreased significantly faster in the ARC-siRNA transfected groups when the dose and treatment time of neomycin increased. (A) HEI-OC-1 cells were transfected with ARC-siRNA or negative-siRNA and treated with 1 mM to 20 mM Neomycin for 24 h to determine the dose response curve. (B) HEI-OC-1 cells were treated with 10 mM neomycin for 1 h to 24 h to determine the temporal response curve. Cell viability was detected by CCK-8. Each condition was performed in triplicate. Data are shown as mean ± S.D. \* $p < 0.05$ .**
